# Supplementary material for: Cetacean bycatch management in regional fisheries management organizations: Current progress, gaps, and looking ahead
Source: Frontiers journal article supplement (doi:10.3389/fmars.2022.1006894), 2023-02-22
Supplement: Data_Sheet_2.xlsx [file Data_Sheet_2.xlsx]

## Sheet: CatA - all RFMOs
Category A - General Bycatch Governance
Tuna RFMOs - answers
	Purse seine CMM	Longline CMM	Gillnet CMM	Other gear CMM	Cetacean conservation CMM	General bycatch CMM	Convention reference	Voluntary initiatives/projects to address cetacean bycatch	Subcommittee, working group, and/or staff member within the Secretariat or RFMO managing and/or investigating bycatch	Performance review recommend bycatch management
CCSBT	1	0	N/A*	0	1	1	1	0	1	1
IATTC	1	0	0	0	0	1	1	1	1	1
ICCAT	0	0	0*	0	0	0	1	1	1	1
IOTC	1	0	0*	0	1	0	0	1	1	1
WCPFC	1	0	N/A*	0	1	0	1	1	1	1
Tuna RFMOs - notes
	Purse seine CMM	Longline CMM	Gillnet CMM	Other gear CMM	Cetacean conservation CMM	General bycatch CMM	Convention reference	Voluntary initiatives/projects to address cetacean bycatch, or resources for capacity building available to member states led by the RFMO?	subcommittee, working group, and/or staff member within the Secretariat or RFMO managing and/or investigating bycatch	Performance review recommend bycatch management
CCSBT	Adopted IOTC Res. 13/04		Gillnets not fished in CCSBT, but they do have a resolution banning large-scale drift gillnet fishing: https://www.ccsbt.org/sites/ccsbt.org/files/userfiles/file/docs_english/operational_resolutions/Resolution_Driftnet.pdf		CCSBT adopted IOTC 13/04, which discusses cetacean conservation.	Received score for: "Resolution to Align CCSBT’s Ecologically Related Species measures with those of other tuna RFMOs." Additionally, while non-binding, note that CCSBT has the following measure: “Recommendation to Mitigate the Impact on Ecologically Related Species of Fishing for Southern Bluefin Tuna." Other measures adopted for taxa other than cetaceans, such as ICCAT Recommendations 13-11 and…	References "ecologically related species" and the need for data collection and exchange.	None found.	Ecologically Related Species Working Group. Terms of reference don't mention bycatch specifically, but do mention ecologically related species.	2014 Performance Review states the need for a more "comprehensive, specific and transparent bycatch policy and management strategy;" "The Secretariat recognized (e.g. at the 1st JTBWG, 2011), that a lack of data on ERS bycatch and of a central database limited the analysis that the CCSBT could conduct on such species," includes a section on "bycatch policy and management strategy," and mentions, …
IATTC	Note: This score is for AIDCP, although it is not technically a CMM.				The AIDCP provides for bycatch limits, mitigation measures, data reporting, and other objectives, but we did not count this as a point towards this category since it is focused on intentional setting of dolphins rather than incidental bycatch, and that pillars of AIDCP (e.g. mitigation measures, managing purse seine interactions, data reporting, etc.) are distributed elsewhere in the scoring.	Received score for: "Consolidated Resolution on Bycatch" (Resolution C-04-05), which addresses several bycatch components — mostly for turtles, juvenile tuna, and billfish — but requires 1. the release of non-target species on purse seines; 2. encourages fishermen to rapidly release non-target species; and other requirements. Several other resolutions exist for the conservation/bycatch management…	Antigua Convention of 2003 mentions non-target species: Part II Article IV states, "Where the status of target stocks or non-target or associated or dependent species is of concern, the members of the Commission shall subject such stocks and species to enhanced monitoring in order to review their status and the efficacy of conservation and management measures. They shall revise those measures reg…	Received point for AIDCP working on designing a new survey for Eastern Tropical Pacific Dolphin Stocks (Document MOP-39-01)/research project "Project H.8.b - Second trial dolphin survey in the eastern tropical Pacific Ocean (ETP)."	Working Group on Bycatch, as well as several IATTC staff members address bycatch and ecosystem science at IATTC/AIDCP.	IATTC’s 2016 Performance Review summarizes several instances where IATTC addresses bycatch, such as through AIDCP and in various CMMs. The Performance Review includes an entire section on bycatch, including a recommendation to improve data collection for longline fleets, but the recommendation addresses all other marine vertebrate taxa except marine mammals. It also included a Recommendation to i…
ICCAT	No measure. The U.S. and Canada have proposed cetacean-purse seine measure previously, but it was not adopted (NOAA 2018).		Note: While not focused on cetaceans, passed "Resolution 96-15 Resolution by ICCAT on large-scale pelagic driftnets"			Multiple other recommendations exist for other singular taxa (e.g. Recommendation 10-09 and 13-11 on turtles; Recommendation 07-07 and 11-09 on seabirds). Note Resolution 15-12, "Resolution by ICCAT Concerning the Application of an Ecosystem Approach to Fisheries Management" is adopted, but it is not included here since it is a resolution (non-binding).	Yes; the Convention was amended in 2019. The new convention text (Article IX, 1(a)(ii)) does not mention the specific key words, but does touch on ERS: "promote, where necessary, the conservation of other species that are dependent on or associated maintaining or restoring populations of such species above levels at which their reproduction may become seriously with ICCAT species, with a view to …	Received point for: Active leadership in helping to organize the 2019 Joint Tuna Working Group meeting (https://www.iccat.int/Documents/meetings/docs/2019/reports/2019_JWGBY-CATCH_ENG.pdf). ICCAT Standing Committee on Research and Statistics (SCRS) Sub-committee of Ecosystems is also developing and Ecosystem report card that, once finalized, should have indicators for marine mammals (ICCAT (2020)…	Bycatch coordinator on staff; ICCAT Standing Committee on Research and Statistics (SCRS) Sub-committee of Ecosystems.	ICCAT has undergone two independent performance reviews, 2008 and 2016. The 2016 review noted that ICCAT can make improvements for data collection surrounding bycatch. The Performance Review also included sections specifically on sea birds and turtles, but did not include a specific section on cetaceans or marine mammals. Overall, however, the independent Performance Review found that, “ICCAT sco…
IOTC	Resolution 13-04, "On the Conservation of Cetaceans"		Note: While not focused on cetaceans, passed "Resolution 17/07 To prohibit the use of large-scale driftnets on the high seas in the IOTC area." Resolution 21/01 also encourages and requires the following actions, though not specific to cetaceans: "Without prejudice to Article 16 of the IOTC Agreement, CPCs shall encourage phasing out or convert gillnet fishing vessels to other gears, considering …		IOTC 13/04, "On the conservation of cetaceans," also discusses cetacean conservation, reporting, and safe handling and release.	Several other CMMs adopted for other taxa (e.g. Resolution 12-04 on turtles), but not a collective measure.	No references to relevant search terms in the Convention.	Received point for: Working with WWF Pakistan on cetacean bycatch and collaborating with the IWC on bycatch initiatives (i.e. IWC-IOTC joint meetings, 2020 and 2021).	Working Group on Ecosystems and Bycatch, as well as a Fisheries Officer and Science Manager on staff.	The most recent IOTC Performance Review, conducted in 2016, included one recommendation on non-target species. This recommended that IOTC improve data collection, particularly for species caught as bycatch.
WCPFC	CMM 2011-03, "Conservation and Management Measure to address impact of purse seine fishing activity on cetaceans"		Note: While not focused on cetaceans, passed "CMM 2008-04, Conservation and Management Measure to Prohibit the use of Large Scale Driftnets on the High Seas in the Convention Area."		WCPFC CMM 11-03, "Conservation and Management Measure to address impact of purse seine fishing activity on cetaceans" discusses conservation, safe handling and release, and reporting.	Several other CMMs adopted for other taxa (e.g. sea turtles - CMM 18-08 and CMM 18-03 seabirds), but not a collective measure.	Several mentions of relevant search terms: e.g. Part II Article 5 (d) states, "assess the impacts of fishing, other human activities and environmental factors on target stocks, non-target species, and species belonging to the same ecosystem or dependent upon or associated with the target stocks;" Part II Article 5 (e) states, "adopt measures to minimize waste, discards, catch by lost or abandoned…	Received point for: Oversight and working with BMIS; Secretariat of the Pacific Regional Environment Program released request for tenders on December 9, 2020 to conduct a "Cetacean Review in the Western Central Pacific Ocean - An ecological review of species interacting with fisheries," including for WCPFC fisheries.	Note that WCPFC treats its former Bycatch Working Group now as a “theme” under the Scientific Committee, titled the “Ecosystem and Bycatch Mitigation Theme” (WCPFC, 2017). Scientific Manager on staff. Works closely with Secretariat of the Pacific Community (SPC) and International Scientific Committee (ISC).	The most recent 2012 Performance Review includes several mentions to bycatch. Noted that WCPFC has not yet undertaken a full ecosystem approach into management, including in applying “bycatch trigger levels” to reduce bycatch. It also recommended that the terms of reference for the Ecosystem and Bycatch Specialist Working Group be evaluated and aligned with FAO guidelines. It did, however, note t…
Non-tuna RFMO - answers
	Purse seine CMM	Longline CMM	Gillnet CMM	Other gear CMM	Cetacean conservation CMM	General bycatch CMM	Convention reference	Voluntary initiatives/projects to address cetacean bycatch?	subcommittee, working group, and/or staff member within the Secretariat or RFMO managing and/or investigating bycatch	Performance review recommend bycatch management
CCAMLR	N/A	0	N/A*	1	0	1	1	1	1	1
GFCM	0	0	1	0	1	0	1	1	1	N/A
NAFO	0	0	0	0	0	1	1	1	1	1
NASCO	N/A	N/A	0	N/A	0	0	0	0	0	1
NEAFC	0	0	0*	0	0	0	1	0	0	1
NPFC	N/A	0	0	0	0	1	1	0	0	N/A
SEAFO	N/A	0	N/A*	0	0	0	1	0	0	1
SIOFA	N/A	0	N/A*	0	0	0	1	0	1	N/A
SPRFMO	0	0	N/A*	0	0	1	1	0	0	1
Non-tuna RFMO - notes
	Purse seine CMM	Longline CMM	Gillnet CMM	Other gear CMM	Cetacean conservation CMM	General bycatch CMM	Convention reference	Voluntary initiatives/projects to address cetacean bycatch, or resources for capacity building available to member states led by the RFMO?	subcommittee, working group, and/or staff member within the Secretariat or RFMO managing and/or investigating bycatch	Performance review recommend bycatch management
CCAMLR	Purse seines not fished in CCAMLR.		CCAMLR does not have gillnet fishing, but it has passed Conservation Measure 22-04, "Interim prohibition of deep-sea gillnetting." Not focused on cetaceans.	1. Conservation Measure 25-3 (2021) "Minimisation of the incidental mortality of seabirds and marine mammals in the course of trawl fishing in the Convention Area" included for this category; 2. Conservation Measure 51-01 (2010) "Precautionary catch limitations on Euphausia superba in Statistical Subareas 48.1, 48.2, 48.3 and 48.4" (mentions exclusion devices necessary for marine mammals on trawl…		Several CMMs with broad relevance for bycatch: Conservaton Measure 33-02 "Limitation of by-catch in Statistical Division 58.5.2 in the 2021/22 season", and Conservation Measure 33-03 "Limitation of by-catch in new and exploratory fisheries in the 2021/22 season."	Ecosystem is referenced multiple times e.g. “[…] prevention of changes or minimization of the risk of changes in the marine ecosystem which are not potentially reversible over two or three decades[…]” (Article II), "that the Commission shall facilitate research of the Antarctic marine ecosystem (Article IX)," and several other references. Also mentions ecological: "maintenance of the ecological r…	Received point for: Annex 91-05C, "Priority elements for scientific research and monitoring in support of the Ross Sea region marine protected area," which calls for "Radio and archival tagging, remote sensing and shore-based population censuses of marine mammals and seabirds." CCAMLR also has an Ecosystem Monitoring Program (CEMP), established to carry out the ecosystem approach established in A…	Several working groups carry out bycatch-related work, including the Working Group on Ecosystem Monitoring and Management (WG-EMM) and the Working Group on Incidental Mortality Associated with Fishing (WG-IMAF). WG-EMM requires assessment for predators (i.e., marine mammals) associated with krill; recent meetings of the WG-EMM involved several reviews of papers related to marine mammals in the re…	Most recent (2017) includes recommendation for Scientific Committee to deliver assessment on status of Antarctic marine living resources, including bycatch, as well as CCAMLR to work with other relevant bodies on bycatch.
GFCM			Recommendation GFCM/37/2013/2 "on the establishment of a set of minimum standards for bottom-set gillnet fisheries exploiting turbot and for the conservation of cetaceans in the Black Sea." Requires, among other things, that: "CPCs shall adopt fisheries management measures to study, monitor, prevent, reduce and, to the extent possible, eliminate incidental catch of cetaceans during fishing operat…		1) Resolution GFCM/43/2019/2 "on enhancing the conservation of cetaceans in the GFCM area of application" (NOTE NON-BINDING); 2) Resolution GFCM/31/2007/4 "on the Pelagos sanctuary for Mediterranean marine mammals" (NOTE NON BINDING); 3) Recommendation GFCM/36/2012/2 "on the mitigation of incidental catches of cetaceans in the GFCM area of application;" 4) Recommendation GFCM/37/2013/2 "on the es…	Several measures on bycatch of other taxa (e.g. GFCM/35/2011/4 "on the incidental bycatch of sea turtles in fisheries in the GFCM area of application"), but there is not a comprehensive bycatch measure.	The Convention mentions discards, such as in Article 5a: " the Commission shall give particular attention to measures to prevent overfishing and minimize discards." There are several other mentions of ecosystems, e.g. Article 8 "ii) to minimize impacts for fishing activities on living marine resources and their ecosystems;"	Received point for: GFCM’s Mid-term strategy (2017–2020) towards the sustainability of Mediterranean and Black Sea fisheries ("Mid-term strategy") requires the implementation of a bycatch monitoring program, including through establishing an observer program, though it is unclear how developed this process is. There is also a Subcommittee on Marine Environment and Ecosystems, which oversees worki…	Subcommittee on Marine Environment and Ecosystems addresses bycatch issues; there is also a Working Group on Fishing Technology, which oversees work on selectivity and bycatch.	2019 Performance Review not publicaly available - 2011 performance review does not reference bycatch or its key terms.
NAFO						Several Conservation and Enforcement Measures with broad relevance to bycatch: 1) Article 6 - Bycatch Retention on Board of Stocks Identified in Annex I.A. as Bycatch When No Directed Fishery is Permitted; and 2) Chapter II, “Protection of Vulnerable Marine Ecosystems (VMEs) in the Regulatory Area from Bottom Fishing Activities” calls for recording of any bycatch species.	Multiple references to the bycatch-related search terms identified in the methodology, including requiring Members to, “[…] minimize discards [in particular endangered species.],” and states that, “the objective of this Convention is to ensure the long term conservation and sustainable use of the fishery resources in the Convention Area and, in so doing, to safeguard the marine ecosystems in whic…	Received point for: NAFO organized a conference in 2008, "The Role of Marine Mammals in the Ecosystem in the 21st Century." NAFO’s website does link several times to NAMMCO, which has an overlapping Convention Area, and the search portion of the website does link to some papers reporting on marine mammal biology or presence in the NAFO Convention Area. Further, a representative from NAFO sat on t…	NAFO has both a Scientific Council and a Working Group on Bycatches, Discards, and Selectivity.	The most recent NAFO Performance Review occurred in 2018. The Panel commended NAFO for its recent Action Plan for the Management and Minimization of Bycatch and Discards, as well as for recent adoption of a shark bycatch measure. The Panel provided a recommendation to NAFO to continue building its Ecosystem and Precautionary Approach.
NASCO	Purse seines not fished in NASCO.	Longlines not fished in NASCO.		NASCO only fishes with gillnets.		CNL(98-46), “Agreement on Adoption of a Precautionary approach,” calls for Members to adopt and apply a precautionary approach to management, and CNL(99)48, “Action Plan for Application of the Precautionary Approach,” calls for salmon bycatch to be considered in implementation of the Precautionary Approach and asks Members and other bodies on information related to salmon bycatch.	The NASCO Convention does not mention any of the target bycatch-related search terms in its Convention, apart from the bycatch of salmon.	The NASCO Convention Area has a very small fishery, with effort only allowed to occur within 12 nautical miles of parties, with the exception of the West Greenland Commission area, where fisheries may take place up to 40 nautical miles from the baselines; and in the North-East Atlantic Commission area, within the area of fisheries jurisdiction of the Faroe Islands. Within these two areas, regulat…	The International Council for the Exploration of the Sea (ICES) provides much of the information on stock status to NASCO	NASCO’s most recent completed Performance Review in 2012 discussed bycatch efforts within NASCO and included recommendations to address bycatch, though bycatch in the Performance Review is focused on salmon. The Performance Review noted that NASCO’s actions towards bycatch are generally consistent with UNFSA, and encouraged NASCO to Review the International Guidelines on By-catch Management and R…
NEAFC			Recommendation 3 (2006): "Recommendation to temporarily proibit the use of gillnets, entangling nets and trammel nets in the NEAFC regulatory area" prohibits gillnets, but it is not focused on cetaceans.			Several indirectly related bans, though not a bycatch-wide measure. For example, current measures include e.g. "Rec 16 2010: Discards Ban 2010," and several other taxa-specific CMMs exist on other species, e.g. "Rec 10 2020: Deep Sea Rays."	The Convention contains several references to "ecosystem:" 1) Article 4, "take due account of the impact of fisheries on other species and marine ecosystems, and in doing so adopt, where necessary, conservation and management measures that address the need to minimise harmful impacts on living marine resources and marine ecosystems;" and, 2) Article 4, "The Commission shall provide a forum for co…	None found.	NEAFC has a Permanent Committee on Management and Science (PECMAS), which works closely with ICES to review impacts to living marine resources; ICES and NEAFC have an MOU (https://www.neafc.org/system/files/ices_mou-2019.pdf); scientific review and analysis is undertaken at ICES for NEAFC.	NEAFC underwent its second Performance Review in 2014. The Panel noted that NEAFC is addressing bycatch through various CMMs and through advice provided by ICES. The Panel recommended that NEAFC work to ensure that Contracting Parties provide accurate reporting on bycatch, that all measures related to bycatch are adhered to, and that observer coverage that reports bycatch be enhanced.
NPFC	Purse seines not fished in NPFC.					1) CMM 2021-05 “Conservation and Management Measure for Bottom Fisheries and Protection of Vulnerable Marine Ecosystems in the NW Pacific Ocean” and 2) CMM 2019-06 “Conservation and Management for Bottom Fisheries and Protection of Vulnerable Marine Ecosystems in the NE Pacific Ocean” calls for any fishing in new deep-sea areas shall employ “precautionary effort limits” if information on target a…	The Convention contains multiple references to protecting the marine ecosystems of target catch (Article 2), following a precautionary and ecosystem approach to management (Article 3), and collecting and sharing data, including on non-target species (Article 3).		NPFC has a recently formed (2019) Small Scientific Committee on Bottom Fish and Marine Ecosystems. Its focus is not directly related to marine mammals, e.g., "assess the status of bottom fish stocks and provide scientific advice for the sustainable management of bottom fisheries resources and prevention of significant adverse impacts on vulnerable marine ecosystems."	NPFC has not conducted a performance review as of early 2022.
SEAFO	Purse seines not fished in SEAFO.		"Recommendation 2/2009 on Banning of gillnets" banned "gillnets" in the Convention Area. It is not focused directly on cetaceans.			No cross-taxa bycatch measure found, but several measures exist specifically for other bycaught taxa besides marine mammals (e.g. Conservation Measure 14/09: To Reduce Sea Turtle Mortality in SEAFO Fishing Operations) and (Conservation Measure 25/12: On Reducing Incidental By-catch of Seabirds in the SEAFO Convention Area).	Article 3(c) mentions cetaceans: "apply the provisions of this Convention relating to fishery resources, taking due account of the impact of fishing operations on ecologically related species such as seabirds, cetaceans, seals and marine turtles;"tThe Convention also gives reference to an ecosystem approach (Article 3) and precautionary approach (Article 7) to management, as well as recording and…		None found.	SEAFO undertook its second Performance Review in 2016. The Review does include several mentions of bycatch, though they are focused on bycatch of target species (e.g., orange roughy). The Review did include one recommendation related to bycatch, which states, “Commission should identify criteria for maximum acceptable ecosystem impacts of fisheries in relation to inter alia habitat impacts and in…
SIOFA	Purse seines not fished in SIOFA.	SIOFA's CMM 2021/15 (Conservation and Management Measure for the Management of Demersal Stocks in the Agreement Area (Management of Demersal Stocks)) includes requirements to manage killer whale depredation in longline fisheries. However, the focus on this measure is about stock management, not exclusively about cetaceans, and thus a point was not awarded here.	CMM 2016/05 "Conservation and Management Measure regarding the use of large‐scale pelagic driftnets and deepwater gillnets in the Southern Indian Ocean Fisheries Agreement Area (Pelagic Driftnets and Deepwater Gillnets)" prohibits the use of large-scale drift gillnets and recommends not fishing with deepwater gillnets. It is not focused on cetaceans.			No cross-taxa bycatch measure found, but several measures exist specifically for other bycaught taxa besides marine mammals (e.g. Conservation Measure 2019/13: Conservation and Management Measure on mitigation of seabirds bycatch in demersal longlines and other demersal fishing gears fisheries (Mitigation of Seabirds Bycatch)).	Article 4(a) calls for, "measures shall be adopted on the basis of the best scientific evidence available to ensure the long-term conservation of fishery resources, taking into account the sustainable use of such resources and implementing an ecosystem approach to their management;"	None found.	Has a Scientific Committee Stock Assessment and Ecological Risk Assessment Working Group (SERAWG). Previous reports mention marine mammals (e.g. http://apsoi.org/sites/default/files/documents/meetings/SIOFA%20SERAWG2%20Final%20Report_0.pdf)	SIOFA has not yet undertaken a Performance Review as of June 2021.
SPRFMO	CMM 01-2022 manages jack mackerel, including jack mackerel fished with purse seines, but the measure does not focus on cetaceans.	CMM 03-2022, "Conservation and Management Measure for the Management of Bottom Fishing in the SPRFMO Convention Area," manages several fisheries including with bottom longlining. It includes reporting requirements for bycatch and interactions with marine mammals, and it tasks the Scientific Committee with the following: "The Scientific Committee shall provide advice biennially to the Commission o…	CMM 08-2019, "Conservation and Management Measure for Gillnets in the SPRFMO Convention Area" prohibits large-scale drift gillnets. In the preamble to the measure, SPRFMO notes UN Resolution 46/215 on “living marine resources” and mentioned concern for "bycatch" species, though not specific to cetaceans.	CMM 14b-2022, "Conservation and Management Measure for Exploratory Potting Fishery in the SPRFMO Convention Area," includes reporting, monitoring and mitigation requirements for this fishery, but it is not counted as a point as the measure does not specifically focus on marine mammals.		SPRFMO has several binding measures related to bycatch. CMM 03-2022, “Conservation and Management Measure for the Management of Bottom Fishing in the SPRFMO Convention Area,” requires the Scientific Committee to provide advice biennially to the Commission on Interactions between bottom fishing and marine mammals. Current exploratory fisheries (CMM14a-2022, 14b-2022 and 14d-2020) also require disc…	The SPRFMO Convention does take an ecosystem approach to management with consideration of non-target resources, such as stating, “fishing shall […] taking into account the impacts on non-target and associated or dependent species and the general obligation to protect and preserve the marine environment;" and “maintain or restore populations of non-target and associated or dependent species to abo…	None found.	None found.	SPRFMO conducted its first Performance Review in 2018. The Review included multiple references to bycatch. The Panel commended SPRFMO for its work on seabirds, and encouraged them to expand seabird bycatch minimization to all fisheries in the Convention Area. The Panel also noted there is limited information on the status of non-target and bycatch species via SPRFMO fisheries, and urges Parties t…
			*Note: RFMOs with an asterick indicate that a general ban on large-scale drift gillnets is in force, but it is not focused specifically on cetaceans unless where noted with a point.

## Sheet: CatB - all RFMOs
Category B - Observer Coverage
Tuna RFMOs - answers
	100% required	ROP required?	Required to submit cetacean interactions
CCSBT	0	1	1
IATTC	0	1	1
ICCAT	0	1	1
IOTC	0	1	1
WCPFC	0	1	1
Tuna RFMOs - notes
	100% required	ROP required?	Required to submit cetacean interactions	observer coverage levels.	notes
CCSBT	The current observer coverage requirement is 10 percent observer coverage levels per CCSBT Scientific Observer Program Standard.	“Resolution on CCBST Scientific Observer Program Standards” outlines the program.	Required to submit identification of ecologically relevant species per CCBST Scientific Observer Program Standards.
IATTC	The current observer coverage requirement is 100% on large purse seine vessels (per AIDCP), 5% on longline vessels (Resolution C-19-08).	Resolution C-19-08, “Scientific Observers for Longline Vessels,” sets observer coverage requirements for longline; AIDCP sets the scheme for an on-board observer program.	Resolution C-19-08, “Scientific Observers for Longline Vessels,” requires five percent observer coverage on vessels over 20 meters, and notes that observers are to record interactions with non-target species (note: does not specifically reference cetaceans or marine mammals). Resolution C-04-05, “Consolidated Resolution on Bycatch,” requires data collection, the release of non-target species inci…
ICCAT	A minimum of 5% observer coverage of fishing effort in each of the pelagic longline, purse seine, baitboat, traps, gillnet and trawl fisheries (Recommendation 16-14); higher and varied levels required in the eastern Atlantic and Mediterranean Bluefin tuna fishery (Recommendation 19-04) and varied levels for tropical tuna fisheries (Recommendation 19-02).	Recommendation 19-04, "Recommendation by ICCAT amending the Recommendation 18-02 Establishing a Multi-annual Management Plan for Bluefin Tuna in the Eastern Atlantic and Mediterranean."	CMM 2011-10, “Recommendation by ICCAT on Information Collection and Harmonization of Data on Bycatch and Discards in ICCAT Fisheries” requires that Contracting Parties, Cooperating non-Contracting Parties, Entities and Fishing Entities (CPCs) collect bycatch and discard data “in their existing domestic scientific observer programs and logbook programs and requires CPCs to report annually on steps…
IOTC	Resolution 11/02 on a regional observer scheme calls for "at least 5 % of the number of operations/sets for each gear type by the fleet of each CPC while fishing in the IOTC area of competence of 24 meters overall length and over, and under 24 meters if they fish outside their Exclusive Economic Zone (EEZ) shall be covered by this observer scheme."	Res. 11-04, "On a Regional Observer Scheme"	Resolution 2013-04, “On the Conservation of Cetaceans.” This requires that vessels operating beyond their EEZs do not intentionally set a purse seine around a cetacean; sets reporting standards in the chance a cetacean is encircled or if vessels of other gear types interact with an animal; and requires CPCs to report information and data collected through logbooks to be reported annually. Resolut…		Looks like only purse seine data needs to be reported?
WCPFC	CMM 2018-05, “Conservation and Management Measure for the Regional Observer Program,” requires 100 percent observer coverage on all purse seine vessels, and five percent observer coverage on all other fisheries managed by WCPFC.	CMM 2018-05, “Conservation and Management Measure for the Regional Observer Program"	The Regional Observer Program has data fields that establish which information needs to be provided on cetacean interactions, which is then used by the WCPFC Scientific Services Provider, the Oceanic Fisheries Programme of the Pacific Community (SPC), to prepare papers related to bycatch. CMM 2011-03, “Conservation and Management Measure for Protection of Cetaceans from Purse Seine Fishing Operat…
Non-tuna RFMO - answers
	100% required	ROP required?	Required to submit cetacean interactions
CCAMLR	0	1	1
GFCM	0	0	1
NAFO	1	1	1
NASCO	0	0	0
NEAFC	0	0	0
NPFC	0	0	1
SEAFO	1	1	1
SIOFA	0	1	1
SPRFMO	0	1	1
Non-tuna RFMO - notes
	100% required	ROP required?	Required to submit cetacean interactions	observer coverage levels.	notes
CCAMLR	In fisheries for icefish and toothfish there is a requirement for 100% coverage by an international (i.e. not from the same flag state as the vessel) observer, while in the krill fishery there is a target coverage of 50% using either international or national observers. Measure 51-06, “General measure for scientific observation in fisheries for Euphausia superba,” requires that vessels have at le…	Yes, via CCAMLR Scheme of International Scientific Observation.	E.g. Conservation Measure 41-08 (2019) "Limits on the fishery for Dissostichus eleginoides in Statistical Division 58.5.2 in the 2021/22 and 2022/23 seasons" requires reporting bycatch. Conservation Measure 23-04 (2016) "Monthly fine-scale Catch and Effort Data Reporting Systemfor trawl, longline and pot fisheries" requires seabirds and marine mammals to be reported.
GFCM	“Recommendation GFCM/42/2018/5 on a multiannual management plan for bottom trawl fisheries exploiting demersal stocks in the Strait of Sicily (geographical subareas 12 to 16)” requires an observer program be created in these fisheries within a menu of requirements,, as well as "Recommendation GFCM/42/2018/4 on a multiannual management plan for sustainable trawl fisheries targeting giant red shrim…	GFCM’s Mid-term strategy (2017–2020) towards the sustainability of Mediterranean and Black Sea fisheries (Mid-term strategy) requires the implementation of a bycatch monitoring program, including through establishing an observer program, which has been implemented in select Mediterranean countries. GFCM also endorses some of ICCAT's measures. However, it does not appear that a ROP is in place.	“Recommendation GFCM/36/2012/2 on mitigation of incidental catches in the GFCM area” requires a variety of protections for marine mammals, including: 1) studying and monitoring cetaceans; 2) sets maximum monofilament net sizes; 3) requires releases of cetaceans as much as possible; 3) requires collection and reported on cetacean bycatch; and 4) calls on the Scientific Advisory Committee to report…
NAFO	Chapater V Observer Scheme/Article 30 on an Observer Program requires that each Party carry an observer at all times when fishing in the Convention Area.	Chapter V Observer Scheme/Article 30 on an Observer Program requires that each Party carry an observer at all times when fishing in the Convention Area.	Article 25 on Vessel Requirements and Chartering requires flag states to maintain a separate record of catch and bycatch data, and report that annually to the Executive Secretary.
NASCO	NASCO does not require observer coverage.		NASCO is not requiring reporting at this time.
NEAFC	Observers required only on deep-sea fisheries, "Rec 10 2021: Amendment to Recommendation 19:2014 on the Protection of VMEs, as amended."	It appears there has been discussion on an ROP but not at this point in time: https://www.sprfmo.int/assets/Meetings/Meetings-2013-plus/Commission-Meetings/4th-Commission-Meeting-2016-Valdivia-Chile/COMM-04-INF-04-Observer-Programmes-of-RFMOs.pdf.	None found. Recommendation 06 2019 on “Roundnose, roughead, Roughsnout and Other Grenadiers” calls for reporting any bycatch to ICES, but this measure has expired.
NPFC	CMM 2019-10 requires 100% observer coverage for sablefish in the eastern part of the Convention Area. Annex 1 requires exploratory fisheries to have 100% coverage. 100% required for all bottom fisheries, though this does not cover all fisheries.	Not yet in place, but standards are being developed for scientific observers within the regional observer program: https://www.pewtrusts.org/en/research-and-analysis/articles/2022/03/16/north-pacific-fisheries-commission-should-guard-against-illegally-caught-fish	CMM 2019-06 “Conservation and Management for Bottom Fisheries and Protection of Vulnerable Marine Ecosystems in the North-eastern Pacific Ocean” calls for any fishing in new deep-sea areas shall employ “precautionary effort limits” if information on target and bycatch species are not available. This measure also requires that catch data on bycatch of marine mammals be collected by observers on bo…
SEAFO	Scientific observers required on all fisheries via the "System of Observervation, Inspection, Compliance, and Enforcement" (2019).	Scientific observers required on all fisheries via the "System of Observervation, Inspection, Compliance, and Enforcement" (2019).	SEAFO's System of Observation, Inspection, Compliance, and Enforcement (2019) requires bycatch reporting.
SIOFA	SIOFA requires 20% observer coverage for longline vessels engaging in bottom fishing and 100% observer coverage for trawlers engaging in bottom fishing (CMM 2020/01 "Conservation and Management Measure for the Interim Management of Bottom Fishing in the Agreement Area)"	Yes, via CMM 2020/01 "Conservation and Management Measure for the Interim Management of Bottom Fishing in the Agreement Area."	CMM 2021/02, “Conservation and Management Measure for the Collection, Reporting, Verification and Exchange of Data relating to fishing activities in the Agreement Area (Data Standards),” requires that Parties collect basic information on all incidental marine mammal bycatch occurrences. It requires national scientific observer programs on all of its vessels. This CMM requires marine mammal intera…
SPRFMO	Most SPRFMO fisheries require 100% coverage (e.g. CMM 03-2022), but not all (10% jack mackerel trawlers and purse seiners, 100% bottom trawl and mid-water trawl, 10% bottom line gear, 100% exploratory fishing). CMM 16-2022, “Conservation and Management Measure Establishing the SPRFMO Observer Program," establishes procedures for the observer programs.	Yes, CMM 16-2022, “Conservation and Management Measure Establishing the SPRFMO Observer Program."	CMM 02-2022, “Conservation and Management Measure on Standards for the Collection, Reporting, Verification and Exchange of Data,” requires that fishing vessels and observers record and describe bycatch – with a specific observer reference to any marine mammals that may have been caught, including their “fate” and types of interactions – as well as record any bycatch mitigation measures employed. …

## Sheet: CatC - bycatch limits
Category C - quantitative bycatch limits
Tuna RFMOs - answers
	CMMs: Quant. Limits or population-level impacts	PR: Quant. Limits or population-level impacts	Risk assessment/scientific assessment	CMMs: efficacy of bycatch reduction?
CCSBT	0	0	0	0
IATTC	1	1	1	1
ICCAT	0	0	1	0
IOTC	0	0	0	0
WCPFC	0	1	0	0
Tuna RFMOs - notes
	CMMs: Quant. Limits or population-level impacts	PR: Quant. Limits or population-level impacts	Risk assessment/scientific assessment	CMMs: efficacy of bycatch reduction?	Notes
CCSBT	None found.	The 2014 Performance review states, "PR-2014-25: It is recommended to bring together all the elements presently related to ERS to elaborate a proper policy and management strategy for ERS, adopting clear objectives as well as reference values or trends, limits and targets, against which performance could be assessed. Better use of observers would improve the efficiency of the policy." However, th…	Ecological risk assessment done for seabirds in 2012 and 2014, one planned for porbeagle sharks, but none for cetaceans. Risk to cetaceans assumed to be low (2014 Performance Review).
IATTC	Annual dolphin mortality limits for purse seines for countries set per vessel under AIDCP.	Indirectly related to this question is a note in the 2016 Performance Review on assessing implications on dolphins populations from the lack of a survey: "Recommendation: Assess risks associated with the dolphin population survey program hiatus. The AIDCP and IATTC scientists should identify risks associated with the hiatus in the dolphin population’s survey program, and determine if it has the p…	Ecological risk assessments planned and underway for several species and the EPO at large (e.g. https://www.iattc.org/Meetings/Meetings2019/IATTC-94/Docs/_English/IATTC-94-04_Staff%20activities%20and%20research%20plan.pdf and https://www.bmis-bycatch.org/system/files/zotero_attachments/library_1/57A2N4KN%20-%20SAC-08-07d-PSA-for-the-longline-fishery.pdf)	International Review Panel established under AIDCP.
ICCAT	Not binding, but Resolution 15-12, "Resolution by ICCAT Concerning the Application of an Ecosystem Approach to Fisheries Management," notes the inclusion of limit reference points.	The 2016 Performance Review does not mention this in respect to cetaceans (https://www.iccat.int/Documents/Other/0-2nd_PERFORMANCE_REVIEW_TRI.pdf).	ICCAT is working to develop an ecosystems report card, including indicators for marine mammals (https://www.iccat.int/Documents/Meetings/Docs/2018/REPORTS/2018_SC_ECO_REP_ENG.pdf) and Sub-Committee on Ecosystems has recommended two ecosystem-based risk assessments, but unclear if marine mammals will be included (https://www.iccat.int/Documents/SCRS/ExecSum/SCECO_REP_ENG.pdf).	n/a
IOTC	None found for cetaceans.	The most recent Performance Review does not reference quantitative limits: https://www.iotc.org/documents/report-2nd-iotc-performance-review	No information found on risk assessment/population assessment.	n/a
WCPFC	None found for cetaceans.	Specific quantitative limits not presented, but several mentions to it in the Performance Review: "In the above terms, the Panel notes that application of a WCPFC PAF has not yet appeared to take into account formal consideration of potential ecosystem effect in the taking of management decisions – for example in the application of bycatch trigger levels to limit fishing when bycatch thresholds a…	No information found on risk assessment/population assessment. *Note: SPREP issued a Request for tenders: Cetacean Review in the Western Central Pacific Ocean - An ecological review of species interacting with fisheries in 2020.	n/a
Non-tuna RFMO - answers
	CMMs: Quant. Limits or population-level impacts	PR: Quant. Limits or population-level impacts	Risk assessment/scientific assessment	CMMs: efficacy of bycatch reduction?	Notes
CCAMLR	0*	1	1	0
GFCM	0	N/A	0	0
NAFO	0	0	0	0
NASCO	0	0	0	0
NEAFC	0	0	0	0
NPFC	0	N/A	0	0
SEAFO	0	0	0	0
SIOFA	0	N/A	0	0
SPRFMO	0	0	0	0
Non-tuna RFMO - notes
	CMMs: Quant. Limits or population-level impacts	PR: Quant. Limits or population-level impacts	Risk assessment/scientific assessment	CMMs: efficacy of bycatch reduction?
CCAMLR	*Not directly related to cetaceans, but several do contain an overall bycatch limit in weight. For example, Measure 33-02, “Limitation of by-catch in Statistical Division 58.5.2 in the 2021/22 season” prohibits bycatch limits no greater than 50 tons in Statistical Division 58.2.2. Conservation Measure 33-03, “Limitation of bycatch in new and exploratory fisheries in the 2021/22 season,” also sets…	In 2017 Performance Review, one recommendation includes: "Recommendation 5: On the basis of currently available data, the Scientific Committee, in consultation with SCAR, external experts and other organisations, deliver an initial assessmentof the status, trends and possible future trajectories of Antarctic marine living resources, andthe interactions of fisheries with them. (paragraphs 30 to 32…	Working Group on Ecosystem Monitoring and Management (WG-EMM) requires assessment for predators (i.e., marine mammals) associated with krill; recent meetings of the WG-EMM involved several reviews of papers related to marine mammals in the region. The WG-IMAF appears primarily focused on seabirds, but in the past has involved several presentations on marine mammals.	No information found
GFCM	No information found	2019 Performance Review not publicly available.	No information found	No information found
NAFO	No information found	Most recent performance review does not mention this.	No information found	No information found
NASCO	No information found	Most recent performance review does not mention this.	No information found	No information found
NEAFC	No information found	Most recent performance review does not mention this.	No information found	No information found
NPFC	No information found	At the time of writing, NPFC was in the process of considering its first Performance Review.	No information found	No information found
SEAFO	No information found	Most recent performance review does not mention this.	No information found	No information found
SIOFA	No information found	Not yet conducted its first Performance Review.	Marine mammal interactions are starting to be addressed with an recent Ecological Risk Assessment (and more work is planned for the future), but they are not currently publicly accessible (per correspondence with SIOFA Secretariat, 2022) and thus not counted as a point.	No information found
SPRFMO	No information found	Most recent performance review does not mention this.	No information found	No information found

## Sheet: CatD - data
Category D - data analysis and transparency
Tuna RFMOs - answers
	Datasets available	Aggregated data/reports available	Data being analyzed
CCSBT	1	1	0
IATTC	1	1	1
ICCAT	1	1	1
IOTC	1	1	1
WCPFC	1	1	1
Tuna RFMOs - notes
	Datasets available	Aggregated reports available	Data being analyzed
CCSBT	Aggregated data available here: https://www.ccsbt.org/en/content/sbt-data	Aggregated data and compliance information is made public via meeting reports: https://www.ccsbt.org/en/content/reports-past-meetings	Cetacean bycatch is negligible to be able to be analyzed.
IATTC	Aggregated data available here: https://www.iattc.org/PublicDomainData/IATTC-Catch-by-species1.htm	Yes, typically through meeting reports: https://www.iattc.org/Minutes/IATTC-AIDCP-Minutes-ReportsENG.htm	IATTC: through AIDCP and the IATTC Secretariat, as well as the Bycatch and FAD Working Groups as well as the Ecosystem and Bycatch considerations reports. IATTC data analysis is done iin-house at the Secretariat.
ICCAT	Aggregated data available here, though outdated: https://www.iccat.int/en/bycatch.html	SCRS does not appear to be reporting data, but some bycatch information available in summary meeting reports: https://www.iccat.int/en/Meetings.asp	Any limited data that does exist published in SC reports
IOTC	Aggregated data is available here: https://www.iotc.org/data/datasets	Aggregated data and summary reports available through WPEB: https://www.iotc.org/meetings	Yes, reported on at WPEB and SC reports
WCPFC	Aggregated data available here: https://www.wcpfc.int/public-domain-bycatch and https://www.wcpfc.int/data-catalogue	There are several reports produced by WCPFC/SPC that analyze available data. For example, the Secretariat of the Pacific Community (SPC) – a program of which serves as the Commission’s Science Services Provider and Data Manager – produced two recent reports analyzing bycatch, including cetaceans, in WCPFC purse seine and longline fisheries from 2003-2017 (Peatman et al. 2017, 2018). Further, the …	WCPFC: through the Pacific Islands Forum Fisheries Agency (FFA) and SPC for WCPFC
Non-tuna RFMO - answers
	Datasets available	Aggregated reports available	Data being analyzed
CCAMLR	1	1	1
GFCM	1	1	1
NAFO	1	1	0
NASCO	1	0	0
NEAFC	1	0	0
NPFC	1	1	0
SEAFO	0	1	0
SIOFA	0	1	0
SPRFMO	1	1	1
Non-tuna RFMO - notes
	Datasets available	Aggregated reports available	Data being analyzed
CCAMLR	CCAMLR does publish some of its data (i.e., fishery summaries and a vulnerable marine ecosystem registry – and some catch and effort data) on its website: https://www.ccamlr.org/en/compliance/fishery-monitoring	Very broad aggregate data reported in https://www.ccamlr.org/en/meetings/27; some in SC reports: https://www.ccamlr.org/en/sc-camlr-39	Yes: https://www.ccamlr.org/en/meetings/27; some in SC reports: https://www.ccamlr.org/en/sc-camlr-39
GFCM	GFCM has a data portal, though most not focused on bycatch data: http://www.fao.org/gfcm/data/en/. Further, GFCM has developed a Data Collection Reference Framework (DCRF) in order to optimize data collection and compilation in the Mediterranean and the Black Sea, to support the formulation of scientific advice for fisheries management. It includes an entire task dedicated to data on incidental c…	Yes, data portal does link to broad online summaries (e.g. clicking on "capture production" then summarizes the extent of marine mammal bycatch): http://www.fao.org/gfcm/data/en/ .	Some SAC reports mention marine mammal bycatch, although they seem to report no cetacean bycatch: http://www.fao.org/gfcm/statutory-meetings/en/
NAFO	Aggregated data here: https://www.nafo.int/Data/STATLANT, though not much reported on marine mammals.	The Scientific Council reports on bycatch totals in specific fisheries in various meeting reports (e.g., Report of the NAFO Commission Ad hoc Working Group to Reflect on the Rules Governing Bycatches, Discards and Selectivity (WG-BDS) in the NAFO Regulatory Area Meeting. 3-17. Retrieved from: https://www.nafo.int/Portals/0/PDFs/COM/2018/comdoc18-04.pdf) and (Report of the Scientific Council Meeti…	No marine mammal bycatch being reported to be analyzed.
NASCO	Little data seems to be publicaly available, but can download statistics for most recent year here: https://nasco.int/ices-2/statistics/	ICES, NASCO Member reports available online, but are individual member reports.	No marine mammal bycatch being reported to be analyzed.
NEAFC	Data available online, but does not include marine mammals: https://www.neafc.org/catch-stats	No reports found online.	No marine mammal bycatch being reported to be analyzed.
NPFC	General fisheries statistics available online, but not for cetacean bycatch. https://www.npfc.int/statistics	SC and other reports online, but none seem to review or mention cetacean bycatch. Recent SC reports mention the collection and reporting of cetacean bycatch data a priority in future years (e.g. https://www.npfc.int/sites/default/files/2021-01/SC05%20Report.pdf). Occasionally review of other bycaught species: https://www.npfc.int/bycatch-species-japanese-bottom-fisheries-emperor-seamounts	No marine mammal bycatch being reported to be analyzed.
SEAFO	Data appears to be available via aggregated stock status or SC meeting reports and through FIRMS, but not bycatch focused: http://www.seafo.org/Science/FIRMS	Very coarse, aggregated data available in SC meeting reports (e.g. 2019 report). Only one mention of cetaceans/marine mammals for past five years (in 2015 report on dusky dolphin bycatch). The "stock status" reports also mention very high-level bycatch summaries. These two types of reports are available here: http://www.seafo.org/Science/SC-Documents	No marine mammal bycatch being reported to be analyzed.
SIOFA	Highly aggregated data available here: http://apsoi.org/meetings/groups/Scientific%20Committee%20Meeting, but it is in PDF form and not datasets	Aggregated fisheries data reports were discussed and approved at the last SC meeting (March 2022). The report is going to be published as an annex to the report (and then a standalone living document) at the end of this week (1st of April). Other data summaries found in meeting reports: http://apsoi.org/meetings/sc6	No marine mammal bycatch being reported to be analyzed.
SPRFMO	Aggregated data is available online, as well information on vessels (https://www.sprfmo.int/data/catch-information/)	Bycatch records largely recorded in SC meeting reports. An overview of bycatch records, presented at the 2019 Scientific Committee meeting, can be found here: http://www.sprfmo.int/assets/2019-SC7/Meeting-Docs/SC7-Doc13-Current-SPRFMO-by-catch-records-summary.pdf and here for 2020: https://www.sprfmo.int/assets/2020-SC8/Report/SPRFMO-SC8-Report-2020.pdf. SC reports contain mentions of marine mamm…	Yes, reviewed in meeting reports.

## Sheet: CatE - mitigation
Category E - mitigation
Tuna RFMOs - answers
	Required safe handling	Safe handling guidelines endorsed	ID cards	Mitigation required or recommended	FAD CMMs addressing marine mammals?
CCSBT	1	0	0	0	N/A
IATTC	1	1	0	1	1
ICCAT	0	0	0	1	1
IOTC	1	0	1	1	1
WCPFC	1	1	1	0	1
Tuna RFMOs - notes
	Required safe handling	Voluntary safe handling	ID cards	Mitigation required	FAD CMMs addressing marine mammals?	Notes
CCSBT	By way of adoption of IOTC 13-04, which requires safe handling and release.	No voluntary guidelines found.	No ID cards found for cetaceans.	Relevant CMMs do not require mitigation: IOTC 13/04 "Resolution to Align CCSBT’s Ecologically Related Species measures with those of other tuna RFMOs," “Recommendation to Mitigate the Impact on Ecologically Related Species of Fishing for Southern Bluefin Tuna”	CCSBT does not seem to have purse seine fishing on FADs (mostly longline), so FADs irrelevant here (see Performance Review: https://www.ccsbt.org/en/system/files/resource/en/53fd82cd72480/EC21_11_PerformanceReview.pdf)
IATTC	AIDCP and Res-04-05 requires "release."	Res 03-08 "encourages" safe release. Bycatch WG recommended to IATTC SC to post safe handling guidelines and marine mammal guidelines on website (https://iattc.org/Meetings/Meetings2019/SAC-10/BYC-09/Docs/_English/BYC-09_%20Recommendations%20of%20the%209th%20Meeting%20of%20the%20Working%20Group%20on%20Bycatch.pdf. Guidelines posted here: https://www.iattc.org/Downloads/Documents/USA_Best%20practi…	No ID cards found for cetaceans.	Yes, AIDCP requires a number of mitigation measures in purse seine fisheries. These include: backdown procedures to release live dolphins, Medina panels to prevent entanglement, no night setting, catch limits per vessel (AIDCP 2019)	While not specifically focusing on marine mammals, C-19-01 calls for several FAD gear changes to reduce entanglement. It also establishes a Permanent Working Group on FADs.
ICCAT	No relevant CMM.	No guidelines found.	No ID cards found for cetaceans.	Resolution 05-08 encourages the use of circle hooks, but not required.	Not specifically focused on cetaceans, but Rec 16-01 has several limitations for FADs: maximum of 500 FADs allowed between ICCAT Members; spatiotemporal closures geared for protecting juvenile bigeye, yellowfin, and skipjack tunas; FAD logbooks required for each deployment; limitations on the number of FADs; by 2016 were requirement to replace existing FADs with "non-entangling FADs" and undertak…
IOTC	Requires safe handling release in IOTC CMM 13-04.	No guidelines endorsed, but report presented at 2013 SC session on safe handling of cetaceans: https://www.iotc.org/documents/best-practice-guidelines-safe-release-and-handling-encircled-cetaceans	ID guides available: https://www.iotc.org/news/cetacean-identification-guide-indian-ocean;	Res. 13-04 does not include any required mitigation beyond avoiding encircling dolphins. Res. 21/02 requires, "CPCs shall set their gillnets at 2m depth from the surface in gillnet fisheries by 2023 to mitigate ecological impacts of gillnets," shown by researchers to reduce cetacean bycatch (e.g. Kiszka et al., 2021).	Res. 13-04 calls for, "CPCs shall adopt Fish Aggregating Device designs that reduce the incidence of entanglement, according to Annex III of Resolution 13/08." Res 19-02 requires FADs to be marked and tracked, requires a FAD management plan by CPCs, sets a limit on the number of FADs by vessel; required to use non-entangling designs; natural or biodegradable FADs are encourcement and required to …
WCPFC	Rec WCPFC 11-3 calls for safe release.	WCPFC endorsed guidelines in December 2021: https://meetings.wcpfc.int/node/15020	ID guides available on website: https://www.wcpfc.int/bmis-links/identification-handling	11-03, "Conservation and Management Measure to address impact of purse seine fishing activity on cetaceans" does not include mitigation beyond avoiding encircling dolphins	CMM 2021-01 requires spatiotemporal closures, calls for avoiding mesh material and sets requirements for mesh nets if they can't be avoided, promots use of biodegradable material in FADs; sets limits on the number of FADs allowed by purse seine vessels at one time - note these don't take effect until 2024. Also has FAD Management Options Intersessional Working Group.
Non-tuna RFMO - answers
	Required safe handling	Voluntary safe handling	ID cards	Mitigation required	FAD CMMs addressing marine mammals?
CCAMLR	0	0	0	1	N/A
GFCM	1	1	1	1	1
NAFO	0	0	0	0	0
NASCO	0	0	0	0	N/A
NEAFC	0	0	0	0	0
NPFC	0	0	0	0	N/A
SEAFO	0	0	0	0	N/A
SIOFA	0	0	0	1	N/A
SPRFMO	1	0	0	1	0
Non-tuna RFMO - notes
	Required safe handling	Voluntary safe handling	ID cards	Mitigation required	FAD CMMs addressing marine mammals?
CCAMLR	None found	None found	No ID cards found for cetaceans.	CM 51-02, 51-03, 51-04 requires marine mammal exclusion devices on trawls	No evidence of FAD fishing
GFCM	Recommendation GFCM/36/2012/2 requires prompt safe release	Guidelines found here, created in conjunction with the FAO and ACCOBAMS: http://www.fao.org/3/ca0015en/CA0015EN.pdf	Guidelines found here, created in conjunction with the FAO and ACCOBAMS: http://www.fao.org/3/ca0015en/CA0015EN.pdf	Recommendation GFCM/37/2013/2 on the establishment of a set of minimum standards for bottom-set gillnet fisheries for turbot and conservation of cetaceans in the Black Sea sets monafilament diameter limits to reduce entanglement. Recommendation GFCM/36/2012/2 recommends (not required) pingers, reflective mitigation on gear.	Recommendation GFCM/43/2019/1: FAD subsurface components shall be exclusively composed of materials that do not entangle non-target species and that biodegradable material should be proritized
NAFO	None found	None found	No ID cards found for cetaceans.	None found	None found
NASCO	None found	None found	No ID cards found for cetaceans.	None found	No evidence of FAD fishing
NEAFC	None found	None found	No ID cards found for cetaceans.	None directly related to marine mammals. For example, Rec 03 2006: Gill Nets 2006 bans gilllnets, trammel nets, and emtangling nets below 200m, but this is not directly related to cetaceans.	None found
NPFC	None found	None found	No ID cards found for cetaceans.	None found	No evidence of FAD fishing
SEAFO	None found	None found	No ID cards found for cetaceans.	None found	No known FAD fishing
SIOFA	None found	None found	No ID cards found for cetaceans.	CMM 2021/15 requires mitigation for reducing depredation.	No known FAD fishing
SPRFMO	CMM 16-2022, "Conservation and Management Measure Establishing the SPRFMO Observer Programme" requires observers to be trained on safe handling and release	None found	No ID cards found for cetaceans.	CMM 14d-2020 Conservation and Management Measure for Exploratory Fishing for Toothfish by Chilean-Flagged Vessels in the SPRFMO Convention Area requires that "vessel shall use trotlines with “Cachalotera” with a maximum of 5,000 hooks per set," among other requirements, though most seem geered more towards sea birds. Measures CMM 14e-2021, 03-2022, 14b-2022, and 14a-2022 also discuss marine mamma…	None found

## Sheet: total scores
OVERALL SCORES AND BASIC SUMMARY STATISTICS
	CCAMLR	CCSBT	GFCM	IATTC	ICCAT	IOTC	NAFO	NASCO	NEAFC	NPFC	SEAFO	SIOFA	SPRFMO	WCPFC		average score of applicable RFMOs	Total count	SD on %applicable RFMOs			Overall % applicable score	SD on % applicable RFMOs
Category A																0.443548	55	0.496803			0.436923	0.496005
A.1. PS CMM	n/a	1	0	1	0	1	0	n/a	0	n/a	n/a	n/a	0	1		0.444444	4	0.527046
A.2. LL CMM	0	0	0	0	0	0	0	n/a	0	0	0	0	0	0		0	0	0
A.3. GN CMM	n/a	n/a	1	0	0	0	0	0	0	0	n/a	n/a	n/a	n/a		0.125	1	0.353553
A.4. OG CMM	1	0	0	0	0	0	0	n/a	0	0	0	0	0	0		0.0769231	1	0.27735
A.5. CC CMM	0	1	1	0	0	1	0	0	0	0	0	0	0	1		0.285714	4	0.468807
A.6. Bycatch CMM	1	1	0	1	0	0	1	0	0	1	0	0	1	0		0.428571	6	0.513553
A.7. Convention	1	1	1	1	1	0	1	0	1	1	1	1	1	1		0.857143	12	0.363137
A.8. Vol. initiatives	1	0	1	1	1	1	1	0	0	0	0	0	0	1		0.5	7	0.518875
A. 9. Subcommittee/staff/WG	1	1	1	1	1	1	1	0	0	0	0	1	0	1		0.642857	9	0.497245
A.10. Performance Review	1	1	n/a	1	1	1	1	1	1	n/a	1	n/a	1	1		1	11	0
Category B																0.571429	24	0.494872
B.1. 100% required	0	0	0	0	0	0	1	0	0	0	1	0	0	0		0.142857	2	0.363137
B.2. ROP required	1	1	0	1	1	1	1	0	0	0	1	1	1	1		0.714286	10	0.468807
B.3. Required to submit cetacean interactions	1	1	1	1	1	1	1	0	0	1	1	1	1	1		0.857143	12	0.363137
Category C																0.150943	8	0.357994
C.1. Bycatch Limit CMM/Pop. Asessment	0	0	0	1	0	0	0	0	0	0	0	0	0	0		0.0714286	1	0.267261
C.2. Bycatch Limit Perf. Rev./Pop. Asessment	1	0	n/a	1	0	0	0	0	0	n/a	0	n/a	0	1		0.272727	3	0.467099
C.3. Risk assessment/scientific assessment	1	0	0	1	1	0	0	0	0	0	0	0	0	0		0.214286	3	0.425815
C.4. Bycatch efficacy CMM	0	0	0	1	0	0	0	0	0	0	0	0	0	0		0.0714286	1	0.267261
Catgory D																0.738095	31	0.439671
D.1. Data publicly available	1	1	1	1	1	1	1	1	1	1	0	0	1	1		0.857143	12	0.508391
D.2. Aggregated data/reports available	1	1	1	1	1	1	1	0	0	1	1	1	1	1		0.857143	12	0.367946
D.3. Data analyzed	1	0	1	1	1	1	0	0	0	0	0	0	1	1		0.5	7	0.455881
Category E																0.375	24	0.484123
E. 1. Required safe handling	0	1	1	1	0	1	0	0	0	0	0	0	1	1		0.428571	6	0.513553
E.2. Voluntary safe handling	0	0	1	1	0	0	0	0	0	0	0	0	0	1		0.214286	9	0.425815
E.3. ID cards	0	0	1	0	0	1	0	0	0	0	0	0	0	1		0.214286	6	0.425815
E.4. Mitigation required or recommended	1	0	1	1	1	1	0	0	0	0	0	1	1	0		0.5	10	0.518875
E.5. FAD CMMs for cetaceans	n/a	n/a	1	1	1	1	0	n/a	0	n/a	n/a	n/a	0	1		0.625	12	0.517549
average score of applicable RFMOs	0.636364	0.478261	0.608696	0.76	0.48	0.56	0.4	0.0952381	0.12	0.238095	0.272727	0.3	0.416667	0.666667
Total count	14	11	14	19	12	14	10	2	3	5	6	6	10	16
SD	0.492366	0.510754	0.499011	0.43589	0.509902	0.506623	0.5	0.300793	0.331662	0.436436	0.455842	0.470162	0.50361	0.481543
